# Supplementary material for: Structural studies of some mono- and bi-nuclear heteroleptic trispyrazolyborate complexes containing eight-co-oordinated europium and gadolinium†
Source: Royal Society of Chemistry journal article supplement (doi:10.1039/b100896j), 2001-01-01
Supplement: b100896j.pdf [file b100896j.pdf]

**Structural Studies of Some Mono- and Bi-nuclear Heteroleptic  
Trispyrazolyborate Complexes Containing Eight Co-ordinated Europium and  
Gadolinium.**

**Royston G. Lawrence, Thomas A. Hamor, Christopher J. Jones,\* Keith Paxton  
and Natalie M. Rowley**

**ELECTRONIC SUPPLEMENTARY INFORMATION**

**Figure E1.** The metal coordination polyhedron of complex 2.

**Figure E2.** The coordination polyhedra at the europium atoms in the dimeric complex 3.

(a) Eu1

(b) Eu2

**Figure E3.** The metal coordination polyhedron in molecule B of complex 4.

**Figure E4.** The metal coordination polyhedron of the gadolinium complex 5.

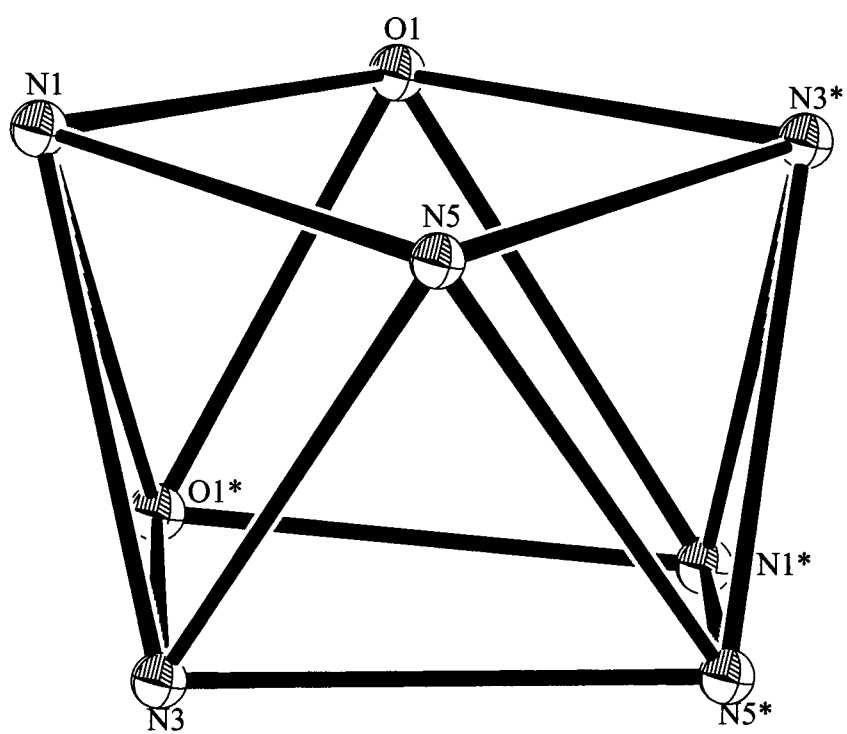

Fig. E1

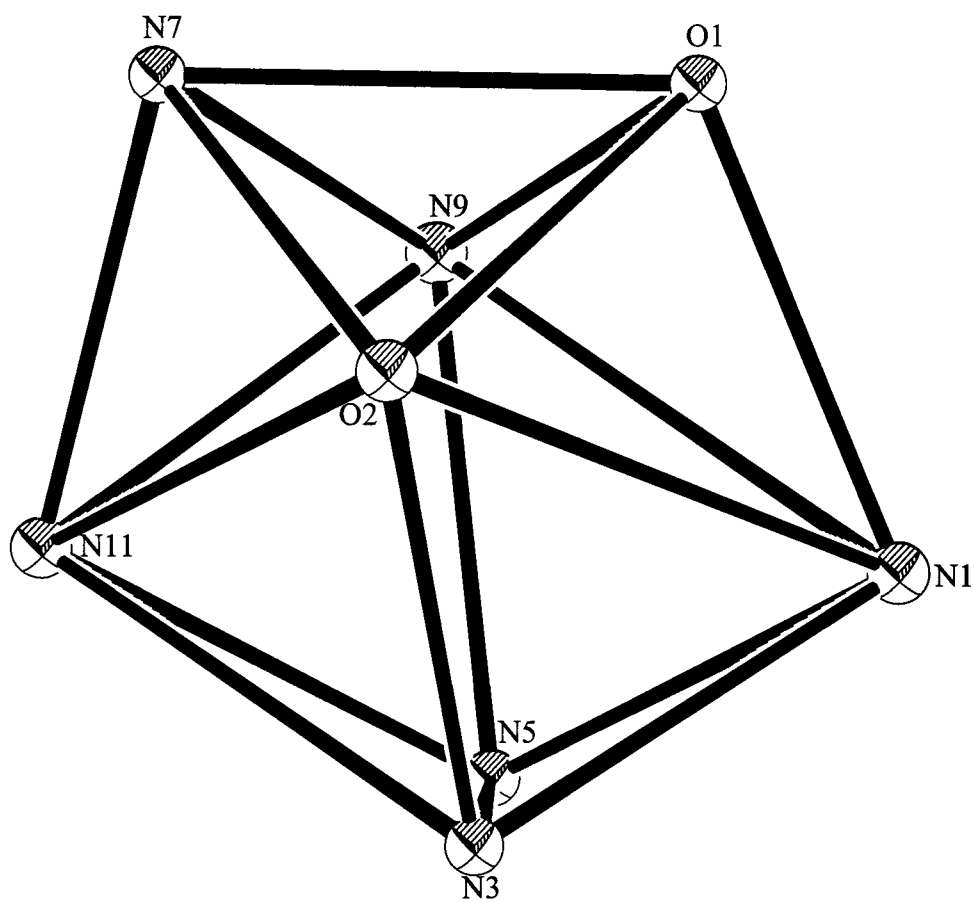

Fig E2a(Eu1)

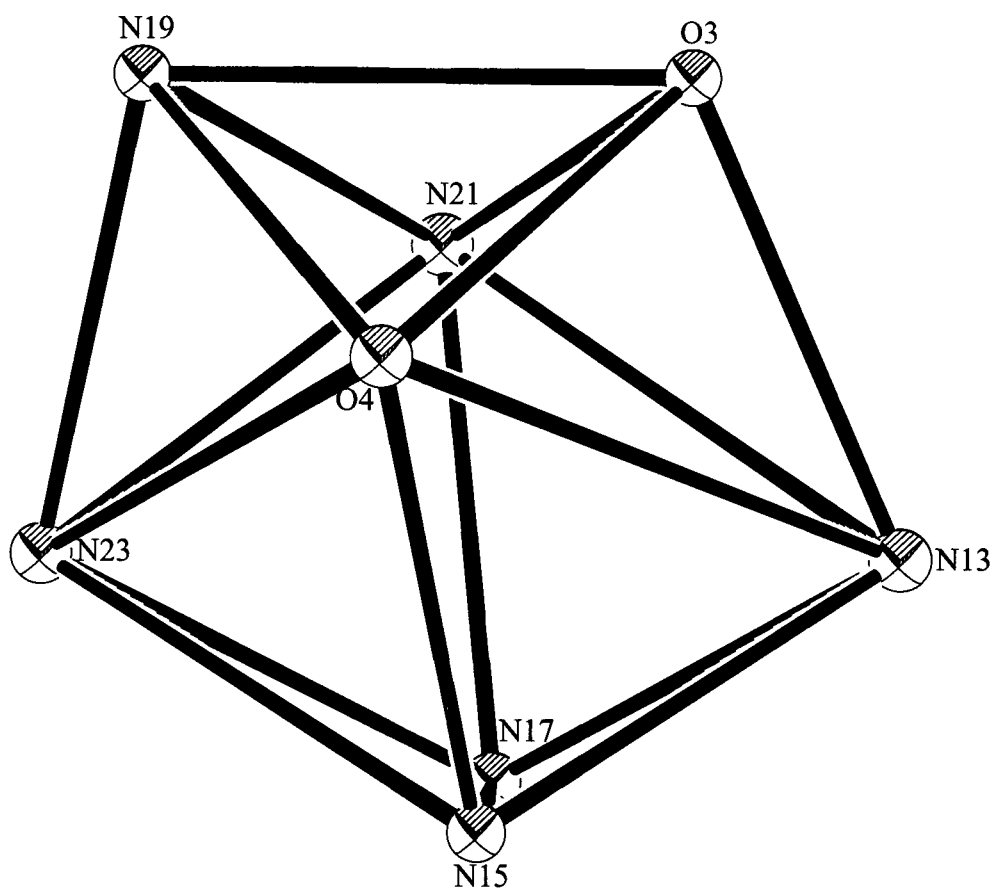

Fig E2b(Eu 2)

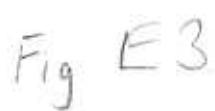

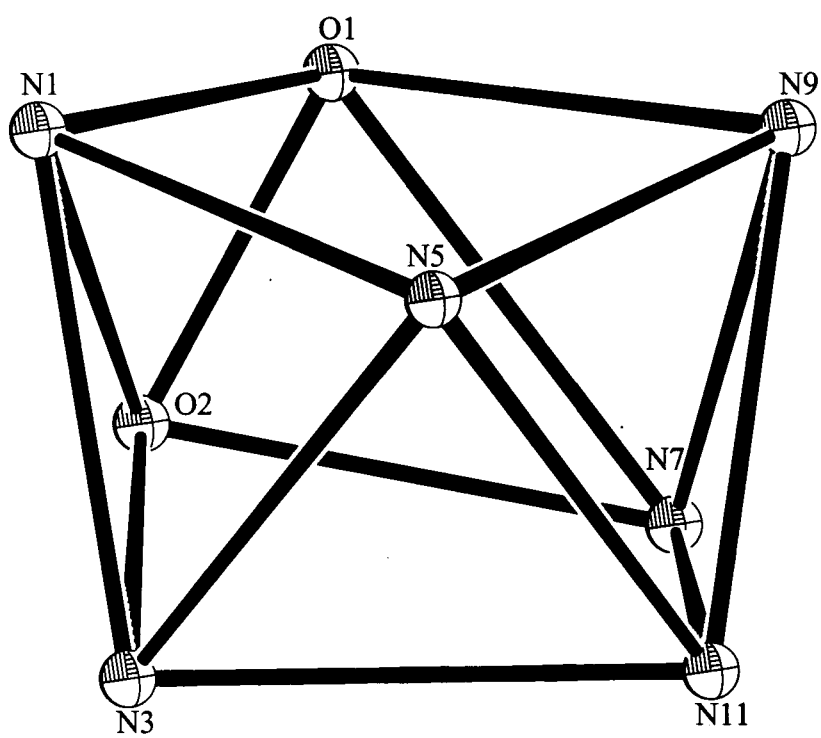

Fig. E4
